# Supplementary material
Source: ML conference proceedings conference paper supplement (https://openaccess.thecvf.com/content/CVPR2026/html/Sen_Mapping_Networks_CVPR_2026_paper.html)
Supplement: Supplementary file 1 [file Sen_Mapping_Networks_CVPR_2026_supplemental.pdf]

# Mapping Networks

Lord Sen      Shyamapada Mukherjee  
National Institute of Technology Rourkela, India

123cs0226@nitrkl.ac.in

mukherjees@nitrkl.ac.in

## 1. Appendix

### 1.1. Baseline Architectures

We have tested our Mapping CNN on tasks like image classification, deepfake detection, and image segmentation. For this, we have chosen three baselines CNN1, 2, 3 variants inspired from AlexNet, Le-Net, U-Net.

The architecture in Table 1 is a compact convolutional neural network inspired by AlexNet. The network begins with four convolutional layers. The first convolution uses 32 filters of size  $3 \times 3$  to extract low-level features, followed by a max-pooling layer that reduces the spatial resolution from  $28 \times 28$  to  $14 \times 14$ . The second convolution expands the feature dimension to 64 channels and is again followed by max-pooling to obtain  $64 \times 7 \times 7$  feature maps. The third and fourth convolutional layers further deepen the representation to 128 channels while maintaining the  $7 \times 7$  spatial size, with another max-pooling step reducing the resolution to  $3 \times 3$ . After the convolutional backbone, the feature map is flattened into a 1152-dimensional vector and passed through a fully connected layer with 256 units, introducing a high-level nonlinear transformation. A final linear layer maps these features to 10 output classes.

| Layer        | Output Size              | Kernel / Units                        | # Params    |
|--------------|--------------------------|---------------------------------------|-------------|
| Conv1        | $32 \times 28 \times 28$ | $1 \times 3 \times 3$ , 32 filters    | 320         |
| MaxPool      | $32 \times 14 \times 14$ | $2 \times 2$                          | –           |
| Conv2        | $64 \times 14 \times 14$ | $32 \times 3 \times 3$ , 64 filters   | 18K         |
| MaxPool      | $64 \times 7 \times 7$   | $2 \times 2$                          | –           |
| Conv3        | $128 \times 7 \times 7$  | $64 \times 3 \times 3$ , 128 filters  | 73K         |
| Conv4        | $128 \times 7 \times 7$  | $128 \times 3 \times 3$ , 128 filters | 147K        |
| MaxPool      | $128 \times 3 \times 3$  | $2 \times 2$                          | –           |
| FC1          | 256                      | $1152 \rightarrow 256$                | 295K        |
| FC2          | 10                       | $256 \rightarrow 10$                  | 2K          |
| <b>Total</b> | –                        | –                                     | <b>538K</b> |

Table 1. Architecture of CNN1.

Table 2 shows a Le-Net inspired variant of CNN with

two convolutional layers followed by two fully connected layers. The first and second convolutions use 16 and 32 filters, respectively, each followed by max-pooling to reduce the spatial size. The flattened 800-dimensional feature vector is mapped to 128 units and finally to 10 output classes. The model has a total of 108,618 parameters.

For the deepfake detection task, we adapt this architecture by changing the output layer to two classes and adjusting the input dimensions while keeping the total number of parameters nearly the same. After preprocessing the video frames to capture temporal and semantic information, each sample is converted into a 2176-dimensional feature vector. This vector is then reshaped to match the expected input size of the modified CNN before training.

| Layer        | Output Size              | Kernel / Units                      | # Params       |
|--------------|--------------------------|-------------------------------------|----------------|
| Conv1        | $16 \times 26 \times 26$ | $1 \times 3 \times 3$ , 16 filters  | 160            |
| MaxPool      | $16 \times 13 \times 13$ | $2 \times 2$                        | –              |
| Conv2        | $32 \times 11 \times 11$ | $16 \times 3 \times 3$ , 32 filters | 4,640          |
| MaxPool      | $32 \times 5 \times 5$   | $2 \times 2$                        | –              |
| FC1          | 128                      | $800 \rightarrow 128$               | 102,528        |
| FC2          | 10                       | $128 \rightarrow 10$                | 1,290          |
| <b>Total</b> | –                        | –                                   | <b>108,618</b> |

Table 2. Architecture of CNN2

The model in Table 3 follows a simple U-Net–style encoder–decoder design for semantic segmentation. The encoder uses three convolution blocks, each increasing the number of feature channels (32, 64, 128) and applying max-pooling to gradually reduce the spatial size while capturing richer features. A bottleneck layer with 256 channels learns the high-level semantic representation.

The decoder then reconstructs the spatial resolution using transpose convolutions, reducing the channel depth at each step ( $256 \rightarrow 128 \rightarrow 64 \rightarrow 32$ ). Skip connections from the encoder are fused at corresponding stages to preserve important spatial details. A final  $1 \times 1$  convolution converts the features into 19 class scores per pixel, resulting in

Table 3. Architecture of CNN3 which is used for Image Segmentation

| Stage                    | Layer Type               | Output Size                 | Kernel / Stride | # Params     |
|--------------------------|--------------------------|-----------------------------|-----------------|--------------|
| <b>Input</b>             | RGB Image                | $3 \times 256 \times 256$   | –               | –            |
| Encoder Block 1          | Conv2d(3→32)             | $32 \times 256 \times 256$  | $3 \times 3/1$  | 896          |
|                          | BatchNorm2d(32)          | $32 \times 256 \times 256$  | –               | 64           |
|                          | Conv2d(32→32)            | $32 \times 256 \times 256$  | $3 \times 3/1$  | 9K           |
|                          | BatchNorm2d(32)          | $32 \times 256 \times 256$  | –               | 64           |
|                          | MaxPool2d                | $32 \times 128 \times 128$  | $2 \times 2/2$  | 0            |
| Encoder Block 2          | Conv2d(32→64)            | $64 \times 128 \times 128$  | $3 \times 3/1$  | 18K          |
|                          | BatchNorm2d(64)          | $64 \times 128 \times 128$  | –               | 128          |
|                          | Conv2d(64→64)            | $64 \times 128 \times 128$  | $3 \times 3/1$  | 37K          |
|                          | BatchNorm2d(64)          | $64 \times 128 \times 128$  | –               | 128          |
|                          | MaxPool2d                | $64 \times 64 \times 64$    | $2 \times 2/2$  | 0            |
| Encoder Block 3          | Conv2d(64→128)           | $128 \times 64 \times 64$   | $3 \times 3/1$  | 74K          |
|                          | BatchNorm2d(128)         | $128 \times 64 \times 64$   | –               | 256          |
|                          | Conv2d(128→128)          | $128 \times 64 \times 64$   | $3 \times 3/1$  | 147K         |
|                          | BatchNorm2d(128)         | $128 \times 64 \times 64$   | –               | 256          |
|                          | MaxPool2d                | $128 \times 32 \times 32$   | $2 \times 2/2$  | 0            |
| Bottleneck               | Conv2d(128→256)          | $256 \times 32 \times 32$   | $3 \times 3/1$  | 295K         |
|                          | BatchNorm2d(256)         | $256 \times 32 \times 32$   | –               | 512          |
|                          | Conv2d(256→256)          | $256 \times 32 \times 32$   | $3 \times 3/1$  | 590K         |
|                          | BatchNorm2d(256)         | $256 \times 32 \times 32$   | –               | 512          |
| Decoder Block 3          | ConvTranspose2d(256→128) | $128 \times 64 \times 64$   | $2 \times 2/2$  | 131K         |
|                          | Concat(e3) → 256 ch      | $256 \times 64 \times 64$   | –               | –            |
|                          | Conv2d(256→128)          | $128 \times 64 \times 64$   | $3 \times 3/1$  | 295K         |
|                          | BatchNorm2d(128)         | $128 \times 64 \times 64$   | –               | 256          |
| Decoder Block 2          | ConvTranspose2d(128→64)  | $64 \times 128 \times 128$  | $2 \times 2/2$  | 33K          |
|                          | Concat(e2) → 128 ch      | $128 \times 128 \times 128$ | –               | –            |
|                          | Conv2d(128→64)           | $64 \times 128 \times 128$  | $3 \times 3/1$  | 74K          |
|                          | BatchNorm2d(64)          | $64 \times 128 \times 128$  | –               | 128          |
| Decoder Block 1          | ConvTranspose2d(64→32)   | $32 \times 256 \times 256$  | $2 \times 2/2$  | 8K           |
|                          | Concat(e1) → 64 ch       | $64 \times 256 \times 256$  | –               | –            |
|                          | Conv2d(64→32)            | $32 \times 256 \times 256$  | $3 \times 3/1$  | 18K          |
|                          | BatchNorm2d(32)          | $32 \times 256 \times 256$  | –               | 64           |
| <b>Classifier</b>        | Conv2d(32→19, 1x1)       | $19 \times 256 \times 256$  | $1 \times 1/1$  | 627          |
| <b>Total (trainable)</b> | –                        | –                           | –               | <b>1735K</b> |

a  $19 \times 256 \times 256$  segmentation map. Overall, the network is lightweight, with about 1.73M trainable parameters.

## 1.2. Results Tables

We have evaluated the performance of our models on various datasets and compared them with baseline methods. The proposed Mapping Networks Ours\* and Ours† represent networks trained by Single Latent Vector and Layer wise training respectively.

Table 4. Image Classification with Mapping CNN

| Method | # Params | MNIST         | FMNIST        |
|--------|----------|---------------|---------------|
| CNN1   | 537,994  | 99.32%        | 92.89%        |
| Ours*  | 1024     | 98.78%        | <b>93.02%</b> |
| Ours*  | 2072     | <b>99.56%</b> | <b>93.91%</b> |
| Ours†  | 4078     | <b>99.67%</b> | <b>94.83%</b> |
| CNN2   | 108,618  | 98.69%        | 90.40%        |
| Ours*  | 1024     | 97.88%        | 89.49%        |
| Ours*  | 2048     | 98.66%        | <b>91.88%</b> |
| Ours†  | 1872     | <b>98.98%</b> | <b>92.84%</b> |
| Ours†  | 2688     | <b>99.18%</b> | <b>93.35%</b> |

Table 5. Mapping CNN on Deepfake Detection

| Method | # Params    | Celeb-DF      | FF++          |
|--------|-------------|---------------|---------------|
| CNN1   | 537,994     | 83.13%        | 82.44%        |
| Ours*  | 1024        | <b>83.92%</b> | 81.11%        |
| Ours*  | 2048        | <b>88.88%</b> | <b>85.23%</b> |
| Ours†  | 1956        | 88.78%        | 86.23%        |
| Ours†  | 2792        | <b>89.98%</b> | <b>88.05%</b> |
| CNN2   | 108,618     | 79.03%        | 79.85%        |
| Ours*  | 1024        | 78.83%        | 82.78%        |
| Ours*  | <b>2048</b> | <b>85.90%</b> | <b>84.09%</b> |
| Ours†  | 1872        | 84.54%        | 83.10%        |
| Ours†  | 2688        | 86.09%        | 86.28%        |

Table 6. Results on Image Segmentation

| Method | # Total   | Pixel Acc | Loss   | mIoU          |
|--------|-----------|-----------|--------|---------------|
| CNN3   | 1,734,803 | 93.21%    | 0.1506 | <b>0.4957</b> |
| Ours*  | 8192      | 97.92%    | 0.1233 | 0.4623        |
| Ours†  | 9126      | 97.56%    | 0.1002 | 0.4823        |

Table 4, showcases the test results of our mapping networks on image classification across MNIST, Fashion MNIST datasets. Baseline CNN2 with 108612 trainable parameters gets a test accuracy of 79.03% on Celeb-DF, whereas our mapping network shows 85.90% accuracy with just 2048 trainable parameters as in Table 5. Table 6 shows

Table 7. Mapping LSTM on Air Pollution dataset

| Method | # Params | MSE Loss       |
|--------|----------|----------------|
| LSTM   | 12961    | 0.0035         |
| Ours*  | 64       | 0.0019         |
| Ours*  | 256      | 0.00093        |
| Ours*  | 512      | 0.00080        |
| Ours*  | 1024     | 0.00065        |
| Ours*  | 2048     | <b>0.00061</b> |

Table 8. Robustness Study of Mapping CNN

| Method        | # Params  | MNIST         | FMNIST        |
|---------------|-----------|---------------|---------------|
| CNN2          | 108,618   | 98.69%        | 90.40%        |
| Full DNN      | 6,753,104 | 97.12 %       | 90.11%        |
| Ours*- WM     | 1024      | 95.62%        | 86.51%        |
| Ours*- WM     | 2048      | 96.55%        | 87.66%        |
| Ours*         | 1024      | 97.88%        | 89.49%        |
| Ours*         | 2048      | <b>98.66%</b> | <b>91.88%</b> |
| LV + WMAP     | 2048      | 97.90%        | 89.30%        |
| LV + WMAP     | 4096      | 98.48%        | 91.93%        |
| LV + FullIDNN | 543,095   | 96.16%        | 90.11%        |
| LV + FullIDNN | 1,629,285 | 97.60%        | 90.67%        |

Table 9. Impact of Add Ons on Mapping Network

| Method        | # Params | MNIST  | FMNIST |
|---------------|----------|--------|--------|
| CNN2          | 108,618  | 98.69% | 90.40% |
| CNN2 + LRD    | 35,914   | 98.12% | 89.67% |
| CNN2 + Prune  | 10862    | 95.87% | 87.91% |
| Ours*         | 2048     | 98.66% | 91.88% |
| Ours* + LRD   | 1456     | 97.80% | 90.67% |
| Ours* + Prune | 2048     | 95.93% | 88.70% |
| Ours†         | 2688     | 99.28% | 94.08% |
| Ours†+LRD     | 2688     | 98.81% | 93.55% |
| Ours† + Prune | 2688     | 97.15% | 91.79% |

the results if our mapping networks on image segmentation task on the cityscapes dataset. The baseline LSTM model achieves MSE of 0.0035 with 12961 parameters but Mapping Networks surpass it with just 64 parameters, and scales further to 0.00061 with increase in latent size as shown in Table 7. Table 10 presents the results of fine-tuning ResNet50 on deepfake detection. The results indicate that our mapping networks can effectively adapt pre-trained models to new tasks with a significantly reduced of trainable parameters while achieving competitive accuracy 95.10% and 91.02% using  $L = 250$ . Variation of results

Table 10. Fine Tuning ResNet50 via Mapping Networks

| Method   | # Params | Layers  | L     | CDF    | FF++   |
|----------|----------|---------|-------|--------|--------|
| ResNet50 | 25M      | All     | -     | 95.23% | 91.78% |
| ResNet50 | 17M      | L-4, FC | -     | 91.11% | 88.03% |
| Ours*    | 2048     | All     | 1     | 97.80% | 94.23% |
| Ours*    | 1024     | L-4, FC | 1     | 94.26% | 91.11% |
| Ours*    | 2048     | All     | 250   | 95.10% | 91.02% |
| Ours*    | 1024     | L-4, FC | 250   | 92.10% | 89.23% |
| Ours*    | 2048     | All     | 25000 | 91.89% | 86.45% |
| Ours*    | 1024     | L-4, FC | 25000 | 89.01% | 84.77% |

with various L is also shown there. We get the best results using L=1.

**On weight-manifold evidence:** From Figure 1, it is very clear that despite the high dimensionality of the parameter space, the weight dynamics evolve along approximately linear, low-dimensional intrinsic subspaces, which had set the ground for Mapping Networks. Figure 1 provides strong evidence of a low-dimensional manifold structure in the parameter spaces of VGG-19 and ResNet-32 on datasets with 10 and 100 classes. Hence, this phenomenon is not limited to small networks or simple datasets, but is general and more pronounced in over-parameterized models.

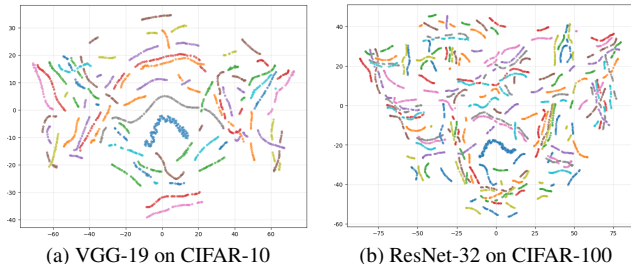

Figure 1. Training trajectories of layer-wise weights effectively lie on low-dimensional subspaces, which are the parameter Manifolds. Plots are of (a) VGG-19 on CIFAR-10 and (b) ResNet-32 on CIFAR-100.

**ResNet-from-scratch experiments:** Table 11 reports ResNet-18 trained from scratch on CIFAR-10/100 using our layer-wise training method. With only 15K parameters, our approach matches ResNet-18 (11.1M params), achieving a 700× reduction. With 20K parameters, it outperforms ResNet-18 by 1.5% and 1.7% on CIFAR-10 and CIFAR-100, respectively. On more complex datasets (FF++ and Celeb-DF), our method with 20K parameters surpasses ResNet-18 (11.7M params) by 2.1% and 2.46% (Table 12), demonstrating the generality and effectiveness of mapping networks for training large models from scratch.

Table 11. CIFAR-10 and 100 results for baselines ResNet-18 and 32 upon training from scratch.

| Model     | Params | CIFAR-10 | Params | CIFAR-100 |
|-----------|--------|----------|--------|-----------|
| ResNet-18 | 11.1M  | 94.11    | 11.7M  | 76.20     |
| Ours      | 10K    | 93.13    | 10K    | 75.80     |
| Ours      | 15K    | 95.02    | 15K    | 77.32     |
| Ours      | 20K    | 95.86    | 20K    | 77.94     |

Table 12. FF++ and Celeb-DF results for baselines ResNet-18 and 32 upon training from scratch.

| Model     | Params | FF++  | Params | Celeb-DF |
|-----------|--------|-------|--------|----------|
| ResNet-18 | 11.7 M | 90.23 | 11.7M  | 91.10    |
| Ours      | 15K    | 91.10 | 15K    | 91.96    |
| Ours      | 20K    | 92.33 | 20K    | 93.56    |

### 1.3. Theorem 2: Solvability under Additive Modulation

Let  $\theta^* \in \mathbb{R}^P$ ,  $\omega_0 \in \mathbb{R}^W$ ,  $z_0 \in \mathbb{R}^d$  denote respectively the target parameter vector, orthogonally initialized weights, and initial latent vector. Let  $M : \mathbb{R}^d \rightarrow \mathbb{R}^W$  be a  $C^2$  modulation ( $M(z) = Bz$  for our case) modulating the fixed mapping weights as  $\omega(z) = \omega_0 + M(z)$ . Then our mapping network is  $g_\omega(z) := g_{\omega(z)}(z) \in \mathbb{R}^P$  is one such  $g$  which satisfies Mapping Theorem. We prove this in two parts first in the local neighborhood and then a global extension using gradient descent.

**(2.1) Local solvability.** There exists  $\varepsilon > 0$  such that for a residual,

$$\mathbf{r}_\theta := \theta^* - g_{\omega_0}(z_0). \quad (1)$$

if  $\|\mathbf{r}_\theta\| \leq \varepsilon$ , then  $\exists \Delta z$ , a constant  $C > 0$  such that,

$$\|\Delta z\| = O(\|\mathbf{r}_\theta\|) \text{ and } \|g_\omega(z_0 + \Delta z) - \theta^*\| \leq C\|\mathbf{r}_\theta\|^2. \quad (2)$$

Consequently, by (8),

$$|\mathcal{L}(g_\omega(z_0 + \Delta z)) - \mathcal{L}(\theta^*)| \leq L_\ell L_\theta C\|\mathbf{r}_\theta\|^2. \quad (3)$$

**(2.2) Global extension.** For any prescribed tolerance  $\varepsilon > 0$   $\exists$  constants  $C_2, L_\theta, L_\ell, r > 0$  and a latent vector  $z^* \in \mathbb{R}^d$ , obtainable by gradient-based optimization under standard local convergence conditions on  $\mathcal{L}(g_\omega(z))$ , such that

$$\|g_\omega(z^*) - \theta^*\| \leq \delta, \quad |\mathcal{L}(g_\omega(z^*)) - \mathcal{L}(\theta^*)| \leq \varepsilon, \quad (4)$$

where  $\delta = \varepsilon/(L_\ell L_\theta)$ . Moreover, the latent displacement  $\Delta z^* := z^* - z_0$  satisfies the bound

$$\|\Delta z^*\| \leq \sqrt{\frac{\delta}{C_2}}, \quad (5)$$

and this bound holds independently of the initial residual.

Before starting the proof, since  $g_\omega(z)$  is  $C^2$  in  $(\omega, z)$ , let's evaluate the Jacobians at  $(\omega_0, z_0)$ :

$$J_\omega := \left. \frac{\partial g_\omega(z)}{\partial \omega} \right|_{(\omega_0, z_0)}, \quad J_z := \left. \frac{\partial g_\omega(z)}{\partial z} \right|_{(\omega_0, z_0)}, \quad (6)$$

and define the local control matrix

$$A := J_\omega B + J_z \in \mathbb{R}^{P \times d}, \quad B := M'(z_0). \quad (7)$$

Assumptions:

- (1)  $\mathcal{A}$  admits a bounded pseudo-inverse, i.e.  $\|\mathcal{A}^\dagger\| < \infty$ .
- (2) The loss  $\mathcal{L} : \mathbb{R}^P \rightarrow \mathbb{R}$  is locally Lipschitz: there exist constants  $L_\mathcal{L}, L_\theta > 0$  and radius  $r > 0$  such that

$$|\mathcal{L}(\theta_1) - \mathcal{L}(\theta_2)| \leq L_\mathcal{L} L_\theta \|\theta_1 - \theta_2\|, \quad \forall \theta_1, \theta_2 \in B(\theta^*, r). \quad (8)$$

- (3) The second derivatives of  $g$  and  $M$  are bounded near  $(\omega_0, z_0)$ , so Taylor remainders are  $O(\|\Delta z\|^2)$ .

## Proofs

### 2.1. Proof of Local Solvability:

To show the existence of  $z$  such that  $\|g_\omega(z) - \theta^*\| < \delta$ , hence guaranteeing small loss difference by the Lipschitz bound. For small perturbations  $(\Delta\omega, \Delta z)$  around  $(\omega_0, z_0)$ ,

$$g_{\omega_0 + \Delta\omega}(z_0 + \Delta z) = g_{\omega_0}(z_0) + J_\omega \Delta\omega + J_z \Delta z + R(\Delta\omega, \Delta z). \quad (9)$$

where  $\|R(\Delta\omega, \Delta z)\| \leq C_R(\|\Delta\omega\|^2 + \|\Delta z\|^2)$ .

Now, the modulation-induced weight change is,

$$\begin{aligned} \Delta\omega &= \omega(z_0 + \Delta z) - \omega_0 \\ &= M(z_0 + \Delta z) - M(z_0) \\ &= B \Delta z + r_M(\Delta z). \end{aligned} \quad (10)$$

with  $\|r_M(\Delta z)\| = O(\|\Delta z\|^2)$  (zero if  $M$  is linear).

Substituting this,

$$g_\omega(z_0 + \Delta z) - g_{\omega_0}(z_0) = (J_\omega B + J_z) \Delta z + \mathcal{E}(\Delta z), \quad (11)$$

where  $\mathcal{E}(\Delta z) = J_\omega r_M(\Delta z) + R(B \Delta z + r_M(\Delta z), \Delta z)$ , and  $\|\mathcal{E}(\Delta z)\| = O(\|\Delta z\|^2)$ .

Hence, the desired condition  $g_\omega(z_0 + \Delta z) = \theta^*$  becomes

$$\mathcal{A} \Delta z + \mathcal{E}(\Delta z) = \mathbf{r}_\theta. \quad (12)$$

Under Assumption (1), there exists a least-norm solution  $\Delta z_{\text{lin}}$  to the linear part  $\mathcal{A} \Delta z_{\text{lin}} = \mathbf{r}_\theta$ , satisfying  $\|\Delta z_{\text{lin}}\| \leq \|\mathcal{A}^\dagger\| \|\mathbf{r}_\theta\|$ .

Lets define the contraction map

$$\Phi(\Delta z) = \Delta z_{\text{lin}} - \mathcal{A}^\dagger \mathcal{E}(\Delta z). \quad (13)$$

Since  $\|\mathcal{E}(\Delta z)\| = O(\|\Delta z\|^2)$ , for sufficiently small  $\|\mathbf{r}_\theta\|$  the map  $\Phi$  is a contraction on a ball centered at  $\Delta z_{\text{lin}}$ . Hence, by Banach's fixed-point theorem, a unique solution  $\Delta z^*$  exists with  $\|\Delta z^*\| = O(\|\mathbf{r}_\theta\|)$ .

Substituting  $\Delta z^*$  into the nonlinear equation gives  $\|\Theta(z_0 + \Delta z^*) - \theta^*\| = O(\|\mathbf{r}_\theta\|^2)$ , establishing the local quadratic solvability. By the Lipschitz bound on the loss, this implies

$$|\mathcal{L}(g_\omega(z_0 + \Delta z^*)) - \mathcal{L}(\theta^*)| \leq L_\mathcal{L} L_\theta O(\|\mathbf{r}_\theta\|^2), \quad (14)$$

achieving the same  $\delta$ -approximation guarantee as in the Mapping Theorem. Let a target loss tolerance  $\varepsilon > 0$  be given. Set

$$\delta := \frac{\varepsilon}{L_\mathcal{L} L_\theta}. \quad (15)$$

From the fixed-point construction we obtained the quadratic residual bound

$$\|g_\omega(z_0 + \Delta z^*) - \theta^*\| \leq C_1 \|\mathbf{r}_\theta\|^2, \quad (16)$$

for some constant  $C_1 > 0$  (depending on bounds on second derivatives and  $\|\mathcal{A}^\dagger\|$ ). To ensure the parameter error is at most  $\delta$ , it suffices to require

$$C_1 \|\mathbf{r}_\theta\|^2 \leq \delta, \quad \text{i.e.} \quad \|\mathbf{r}_\theta\| \leq \sqrt{\frac{\delta}{C_1}}. \quad (17)$$

Thus, if the initial residual satisfies the smallness condition

$$\|\mathbf{r}_\theta\| \leq \varepsilon_0 := \min\left\{\varepsilon, \sqrt{\frac{\delta}{C_1}}\right\}, \quad (18)$$

(for some  $\varepsilon > 0$  chosen so that the Taylor/remainder estimates used above hold), then

$$\|g_\omega(z_0 + \Delta z^*) - \theta^*\| \leq \delta. \quad (19)$$

Applying the local Lipschitz bound we obtain

$$\begin{aligned} |\mathcal{L}(g_\omega(z_0 + \Delta z^*)) - \mathcal{L}(\theta^*)| &\leq L_\mathcal{L} L_\theta \|g_\omega(z_0 + \Delta z^*) - \theta^*\| \\ &\leq L_\mathcal{L} L_\theta \delta = \varepsilon. \end{aligned} \quad (20)$$

Therefore, for any prescribed loss tolerance  $\varepsilon > 0$  one can choose  $\delta = \varepsilon/(L_\mathcal{L} L_\theta)$  and an initial residual bound  $\varepsilon_0$  (as above) so that the constructed latent update  $z_0 + \Delta z^*$  yields a parameter vector within  $\delta$  of  $\theta^*$  and hence within  $\varepsilon$  in loss.

## 2.2. Proof for Global Extension:

We show the existence of a latent vector  $z^*$  such that

$$\|g_\omega(z^*) - \theta^*\| \leq \delta, \quad (21)$$

which, via the Lipschitz property of the loss, guarantees a small loss difference.

Since  $\omega(z) = \omega_0 + M(z)$ , the mapping  $g_\omega(z)$  can be viewed as a composition  $\tilde{g}(z) := g_{\omega(z)}(z)$  depending solely on  $z$ . Thus, optimization is performed entirely in latent space, and convergence of  $z_t \rightarrow z^*$  implies  $g_\omega(z_t) \rightarrow g_\omega(z^*)$  by continuity.

For small perturbations  $\Delta z = z - \tilde{z}$  around a reference latent  $\tilde{z}$ , a second-order Taylor expansion yields

$$g_\omega(\tilde{z} + \Delta z) = g_\omega(\tilde{z}) + \mathcal{A}\Delta z + \mathcal{E}(\Delta z), \quad (22)$$

where  $\mathcal{A} = J_\omega B + J_z$  and the remainder satisfies

$$\|\mathcal{E}(\Delta z)\| \leq C_2 \|\Delta z\|^2. \quad (23)$$

We optimize  $z$  via gradient descent on  $\mathcal{L}(g_\omega(z))$ :

$$z_{t+1} = z_t - \eta \nabla_z \mathcal{L}(g_\omega(z_t)). \quad (24)$$

By the chain rule,

$$\nabla_z \mathcal{L}(g_\omega(z)) = \mathcal{A}^\top \nabla_\theta \mathcal{L}(g_\omega(z)). \quad (25)$$

Assuming a local quadratic approximation of the loss,

$$\mathcal{L}(\theta) \approx \frac{1}{2} \|\theta - \theta^*\|^2, \quad (26)$$

we obtain

$$\nabla_z \mathcal{L}(g_\omega(z)) \approx \mathcal{A}^\top (g_\omega(z) - \theta^*). \quad (27)$$

Let  $\tilde{z}$  denote a reference iterate and define the local residual

$$\mathbf{r}_\theta := \theta^* - g_\omega(\tilde{z}). \quad (28)$$

Using (22), we obtain the local approximation

$$\nabla_z \mathcal{L}(g_\omega(\tilde{z} + \Delta z)) \approx \mathcal{A}^\top (\mathcal{A}\Delta z - \mathbf{r}_\theta). \quad (29)$$

The corresponding continuous-time gradient flow is given by

$$\frac{d(\Delta z)}{dt} = -\mathcal{A}^\top \mathcal{A} \Delta z + \mathcal{A}^\top \mathbf{r}_\theta. \quad (30)$$

The linearized dynamics suggest convergence toward a least-squares solution of

$$\mathcal{A}\Delta z \approx \mathbf{r}_\theta, \quad (31)$$

which serves as an initialization regime for the nonlinear optimization.

Under standard local convergence conditions (smoothness and sufficiently small step size), gradient descent produces iterates  $z_t \rightarrow z^*$  satisfying

$$\nabla_z \mathcal{L}(g_\omega(z^*)) = 0. \quad (32)$$

Defining  $\Delta z^* := z^* - \tilde{z}$ , we analyze the solution in displacement coordinates.

Substituting into (22), the nonlinear residual satisfies

$$\begin{aligned} \|g_\omega(\tilde{z} + \Delta z^*) - \theta^*\| &= \|\mathcal{A}\Delta z^* + \mathcal{E}(\Delta z^*) - \mathbf{r}_\theta\| \\ &= \|\mathcal{E}(\Delta z^*)\| \\ &\leq C_2 \|\Delta z^*\|^2. \end{aligned} \quad (33)$$

Let  $\delta > 0$  be a target parameter tolerance. To ensure

$$\|g_\omega(z^*) - \theta^*\| \leq \delta, \quad (34)$$

it suffices that

$$\|\Delta z^*\| \leq \sqrt{\frac{\delta}{C_2}}. \quad (35)$$

This condition depends only on the local geometry of  $g_\omega$  and not explicitly on the initial residual.

Finally, using the Lipschitz property of  $\mathcal{L}$ ,

$$|\mathcal{L}(g_\omega(z^*)) - \mathcal{L}(\theta^*)| \leq L_{\mathcal{L}} L_\theta \|g_\omega(z^*) - \theta^*\| \leq L_{\mathcal{L}} L_\theta \delta = \varepsilon. \quad (36)$$

Hence proved.
